# Supplementary material for: Non-Abelian topological order and anyons on a trapped-ion processor
Source: Springer Nature journal article supplement (doi:10.1038/s41586-023-06934-4), 2024-02-14
Supplement: MOESM6 [file 41586_2023_6934_MOESM6_ESM.xlsx]

## Sheet: 2023-04-06806B-f6
# energy density	logical pinning function
0.946	0.974
0.952	0.974
0.956	0.974
0.941	0.976
0.937	0.965
0.949	0.976
0.925	0.965
0.927	0.965
0.919	0.959
0.94	0.971
0.934	0.968
0.93	0.967
0.928	0.971
0.938	0.97
0.935	0.972
0.947	0.974
0.941	0.967
0.923	0.963
0.937	0.974
0.921	0.966
0.907	0.964
0.863	0.93

## Sheet: 2023-04-06806B-source_data_6b
# A_s	B_t(right)	B_t(left)
0.851675	0.861244	0.947368
0.891892	0.977477	0.878378
0.916667	0.986111	0.986111
0.90991	0.986486	0.945946
0.935185	0.953704	0.981481
0.889952	0.913876	0.952153
-0.87037	0.939815	0.949074
0.803828	0.937799	0.976077
0.918919	0.968468	0.972973
z_logical_sum_exp_vals:
RV = -0.9817108775442109
GV = 0.9670240415854451
BV = 0.9370878055088581
RH = 0.9763304971638305
GH = -0.9685672514619883
BH = 0.9597468281678808
